# Supplementary material for: Fast Methods for Prediction of Aldehyde Oxidase-Mediated Site-of-Metabolism
Source: PubMed Central journal article supplement — Comput Struct Biotechnol J. 2019 Mar 7;17:345–51. doi: 10.1016/j.csbj.2019.03.003 (PMC6429535; doi:10.1016/j.csbj.2019.03.003), 2019-03-07
Supplement: mmc1.pdf [file mmc1.pdf]

Supplementary material for

# Fast Methods for Prediction of Aldehyde Oxidase-Mediated Site-of-Metabolism

Marco Montefiori<sup>1,2</sup>, Casper Lyngholm-Kjærby<sup>1</sup>, Anthony Long<sup>3</sup>, Lars Olsen<sup>1,4</sup>, Flemming Steen Jørgensen<sup>1,\*</sup>

<sup>1</sup> Department of Drug Design and Pharmacology, University of Copenhagen, Jagtvej 162, DK-2100, Copenhagen, Denmark.

<sup>2</sup> Present address: CNR-ICRM, Via Mario Bianco 9, 20131 Milan, Italy.

<sup>3</sup> Lhasa Limited, Granary Wharf House, 2 Canal Wharf, Leeds LS11 5PS, UK.

<sup>4</sup> Present address: Protein Engineering, Novozymes A/S, Krogshøjvej 36, DK-2880 Bagsvaerd, Denmark.

\* Corresponding author. E-mail address: fsj@sund.ku.dk (F.S. Jørgensen)

List of supplementary material:

|                |                                                                           |
|----------------|---------------------------------------------------------------------------|
| Table S1.      | Values of Q1, median, Q3, and whiskers for the box plots shown in Fig. 2. |
| Fig. S1.       | 2D structures of compounds.                                               |
| Montefiori.csv | CSV file with calculated data for SOMs and non-SOMs in the 78 compounds.  |
| Montefiori.sdf | SDF file with coordinates of the 78 compounds and experimental SOMs.      |

**Table S1.** Values of the Q1, median, Q3, and whiskers for the box plots shown in Fig. 2.

| <b>Descriptor</b>           | <b>Median</b> | <b>Q1</b> | <b>Q3</b> | <b>High Whisker</b> | <b>Low Whisker</b> | <b>Highest value</b> | <b>Lowest value</b> |
|-----------------------------|---------------|-----------|-----------|---------------------|--------------------|----------------------|---------------------|
| Chemical Shielding (SOM)    | 68.6          | 64.9      | 73.9      | 87.4                | 51.4               | 96.1                 | 33.5                |
| Chemical Shielding (no SOM) | 47.1          | 42.8      | 51.5      | 63.0                | 35.1               | 63.0                 | 35.5                |
| Chemical Shift (SOM)        | 127.5         | 121.7     | 132.0     | 147.4               | 106.3              | 163.8                | 85.0                |
| Chemical Shift (no SOM)     | 149.9         | 146.7     | 155.2     | 164.5               | 136.7              | 164.5                | 136.7               |
| ESP Charges (SOM)           | -0.14         | -0.33     | 0.01      | 0.51                | -0.70              | 0.68                 | -0.70               |
| ESP Charges (no SOM)        | 0.39          | 0.27      | 0.47      | 0.72                | -0.02              | 0.72                 | -0.20               |
| Gasteiger Charges (SOM)     | -0.04         | -0.05     | -0.01     | 0.04                | -0.11              | 0.21                 | -0.20               |
| Gasteiger Charges (no SOM)  | 0.06          | 0.03      | 0.10      | 0.19                | -0.04              | 0.21                 | -0.04               |
| Product Stability (SOM)     | 94.9          | 80.8      | 100.8     | 130.7               | 50.9               | 162.6                | 7.1                 |
| Product Stability (no SOM)  | 66.9          | 55.6      | 81.4      | 120.1               | 16.8               | 126.6                | 0.0                 |
| Relative Span (SOM)         | 0.82          | 0.74      | 0.90      | 1.00                | 0.53               | 1.00                 | 0.53                |
| Relative Span (no SOM)      | 0.86          | 0.75      | 1.00      | 1.00                | 0.55               | 1.00                 | 0.55                |
| 2D-SASA (SOM)               | 28.8          | 26.1      | 32.7      | 41.1                | 16.5               | 41.2                 | 16.5                |
| 2D-SASA (no SOM)            | 33.6          | 31.2      | 36.0      | 39.6                | 24.2               | 39.6                 | 21.3                |

Fig. S1. 2D structures of compounds.

|                                                                                                                                     |                                                                                                                                        |                                                                                                                                      |                                                                                                                                       |
|-------------------------------------------------------------------------------------------------------------------------------------|----------------------------------------------------------------------------------------------------------------------------------------|--------------------------------------------------------------------------------------------------------------------------------------|---------------------------------------------------------------------------------------------------------------------------------------|
| <p><b>1</b></p> 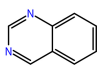 <p>Quinazoline</p>                | <p><b>2</b></p>  <p>6-Aminoquinazoline</p>            | <p><b>3</b></p>  <p>6-Nitroquinazoline</p>         | <p><b>4</b></p>  <p>7-Aminoquinazoline</p>         |
| <p><b>5</b></p>  <p>2-Methylquinazoline</p>        | <p><b>6</b></p>  <p>Quinazoline_Beedham_Q5</p>        | <p><b>7</b></p>  <p>Quinazoline_Beedham_Q7</p>     | <p><b>8</b></p>  <p>Quinazoline_Beedham_Q8</p>     |
| <p><b>9</b></p>  <p>Quinazoline_Beedham_Q9</p>     | <p><b>10</b></p>  <p>Quinazoline_Beedham_Q10</p>      | <p><b>11</b></p>  <p>Quinazoline_Beedham_Q11</p>   | <p><b>12</b></p>  <p>Quinazoline_Beedham_Q12</p>   |
| <p><b>13</b></p>  <p>Quinazoline_Beedham_Q14</p>  | <p><b>14</b></p>  <p>Quinazoline_Beedham_Q13</p>     | <p><b>15</b></p>  <p>Quinazoline_Beedham_Q15</p>  | <p><b>16</b></p>  <p>Phthalazine</p>              |
| <p><b>17</b></p>  <p>1-Chlorophthalazine</p>     | <p><b>18</b></p>  <p>1-Cl-6,7-DiMeO-phthalazine</p> | <p><b>19</b></p>  <p>1-Ethoxyphthalazine</p>     | <p><b>20</b></p>  <p>1-Phenylphthalazine</p>     |
| <p><b>21</b></p>  <p>1-Phenoxyphthalazine</p>    | <p><b>22</b></p>  <p>Phthalazine_Beedham_P7</p>     | <p><b>23</b></p>  <p>Phthalazine_Beedham_P8</p>  | <p><b>24</b></p>  <p>Phthalazine_Beedham_P9</p>  |
| <p><b>25</b></p>  <p>Carbazeran</p>              | <p><b>26</b></p>  <p>Phthalazine_Beedham_P11</p>    | <p><b>27</b></p>  <p>Phthalazine_Beedham_P12</p> | <p><b>28</b></p>  <p>Phthalazine_Beedham_P13</p> |
| <p><b>29</b></p>  <p>Phthalazine_Beedham_P14</p> | <p><b>30</b></p>  <p>Lu29-297</p>                   | <p><b>31</b></p>  <p>DACA</p>                    | <p><b>32</b></p>  <p>Phenanthridine</p>          |

Fig. S1. 2D structures of compounds.

|                                                                                                                                 |                                                                                                                                 |                                                                                                                                     |                                                                                                                                      |
|---------------------------------------------------------------------------------------------------------------------------------|---------------------------------------------------------------------------------------------------------------------------------|-------------------------------------------------------------------------------------------------------------------------------------|--------------------------------------------------------------------------------------------------------------------------------------|
| <p><b>33</b></p> 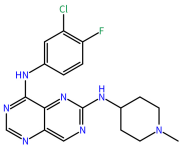 <p>BIBX1382</p>              | <p><b>34</b></p>  <p>Zaleplon</p>              | <p><b>35</b></p>  <p>XK469</p>                    | <p><b>36</b></p>  <p>Zebularine</p>               |
| <p><b>37</b></p>  <p>O6-Benzylguanine</p>      | <p><b>38</b></p>  <p>M1dG</p>                  | <p><b>39</b></p>  <p>Famciclovir</p>              | <p><b>40</b></p>  <p>6-Oxo-Famciclovir</p>        |
| <p><b>41</b></p>  <p>8-Oxo-Famciclovir</p>     | <p><b>42</b></p>  <p>6-Deoxypenciclovir</p>    | <p><b>43</b></p>  <p>6-Oxo-6-Deoxypenciclovir</p> | <p><b>44</b></p>  <p>8-Oxo-6-Deoxypenciclovir</p> |
| <p><b>45</b></p>  <p>6-Mercaptopurine</p>     | <p><b>46</b></p>  <p>OConnor_1</p>            | <p><b>47</b></p>  <p>SGX523</p>                  | <p><b>48</b></p>  <p>Linton_1</p>                |
| <p><b>49</b></p>  <p>FK3453</p>              | <p><b>50</b></p>  <p>Zhang_Ro1</p>           | <p><b>51</b></p>  <p>Zoniporide</p>             | <p><b>52</b></p>  <p>Quinoline_Dalvie_2</p>     |
| <p><b>53</b></p>  <p>Quinoline_Dalvie_3</p>  | <p><b>54</b></p>  <p>Quinoline_Dalvie_4</p>  | <p><b>55</b></p>  <p>Quinoline_Dalvie_5</p>     | <p><b>56</b></p>  <p>Quinoline_Dalvie_6</p>     |
| <p><b>57</b></p>  <p>Quinoline_Dalvie_7</p>  | <p><b>58</b></p>  <p>Quinoline_Dalvie_8</p>  | <p><b>59</b></p>  <p>Quinoline_Dalvie_9</p>     | <p><b>60</b></p>  <p>Quinoline_Dalvie_10</p>    |
| <p><b>61</b></p>  <p>Quinoline_Dalvie_11</p> | <p><b>62</b></p>  <p>Quinoline_Dalvie_12</p> | <p><b>63</b></p>  <p>Quinoline_Dalvie_13</p>    | <p><b>64</b></p>  <p>Quinoline_Dalvie_14</p>    |

Fig. S1. 2D structures of compounds.

|                                                                                                                                |                                                                                                                               |                                                                                                                         |                                                                                                                                  |
|--------------------------------------------------------------------------------------------------------------------------------|-------------------------------------------------------------------------------------------------------------------------------|-------------------------------------------------------------------------------------------------------------------------|----------------------------------------------------------------------------------------------------------------------------------|
| <p><b>65</b></p> 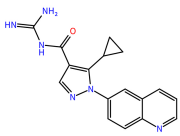 <p>Quinoline_Dalvie_15</p>  | <p><b>66</b></p>  <p>Quinoline_Dalvie_16</p> | <p><b>67</b></p>  <p>Lenvatinib</p>   | <p><b>68</b></p>  <p>Desmethyl_Lenvatinib</p> |
| <p><b>69</b></p>  <p>Loikema_JNJ_38877605</p> | <p><b>70</b></p>  <p>Zientek_PF_4217903</p>  | <p><b>71</b></p>  <p>Xu_7</p>         | <p><b>72</b></p>  <p>Itoh_RS_8359</p>         |
| <p><b>73</b></p>  <p>Morrison_VU0409106</p>   | <p><b>74</b></p>  <p>6-Methylpurine</p>      | <p><b>75</b></p>  <p>Azathioprine</p> | <p><b>76</b></p>  <p>Methotrexate</p>         |
| <p><b>77</b></p>  <p>Brimonidine</p>         | <p><b>78</b></p>  <p>Lu_AF09535</p>         |                                                                                                                         |                                                                                                                                  |
